# Supplementary material
Source: PubMed Central journal article supplement (PMC3513987)
Supplement: Supp_Fig1.pdf [file Supp_Fig1.pdf]

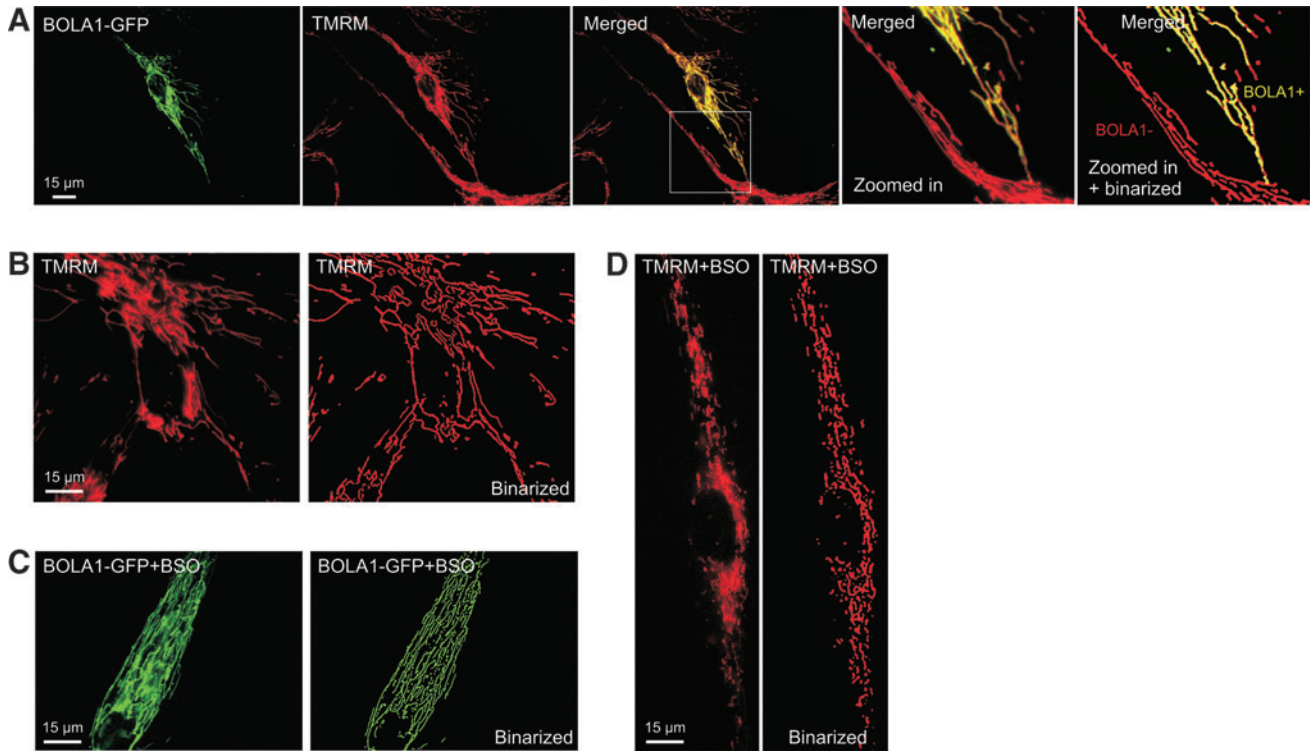

**SUPPLEMENTARY FIG. S1. Representative images of fibroblasts overexpressing BOLA1-GFP, stained with TMRM and/or treated with BSO** (A) Cells transduced with a baculovirus to overexpress BOLA1-GFP (*first panel*) and stained with TMRM (*second panel*). A magnified (*fourth panel*) and subsequently binarized version (*fifth panel*) of the merged image (*third panel*) reveals similar mitochondrial structure in mitochondria without (BOLA-) and with (BOLA+) BOLA1-GFP. (B) Typical mitochondrial morphology in untreated cells as revealed by TMRM staining (*first panel*) and subsequent image binarization (*second panel*). (C) Typical mitochondrial morphology in BSO-treated cells (12.5  $\mu\text{M}$ , 72 h) as revealed by TMRM staining (*first panel*) and subsequent image binarization (*second panel*). (D) Typical mitochondrial morphology in BOLA1-GFP expressing cells treated with BSO (12.5  $\mu\text{M}$ , 72 h). Figure 5D depicts the above visualizations in a quantitative manner. The images in this figure are contrast-optimized for visualization purposes.
