# Supplementary material
Source: PubMed Central journal article supplement (PMC3513987)
Supplement: Supp_Fig2.pdf [file Supp_Fig2.pdf]

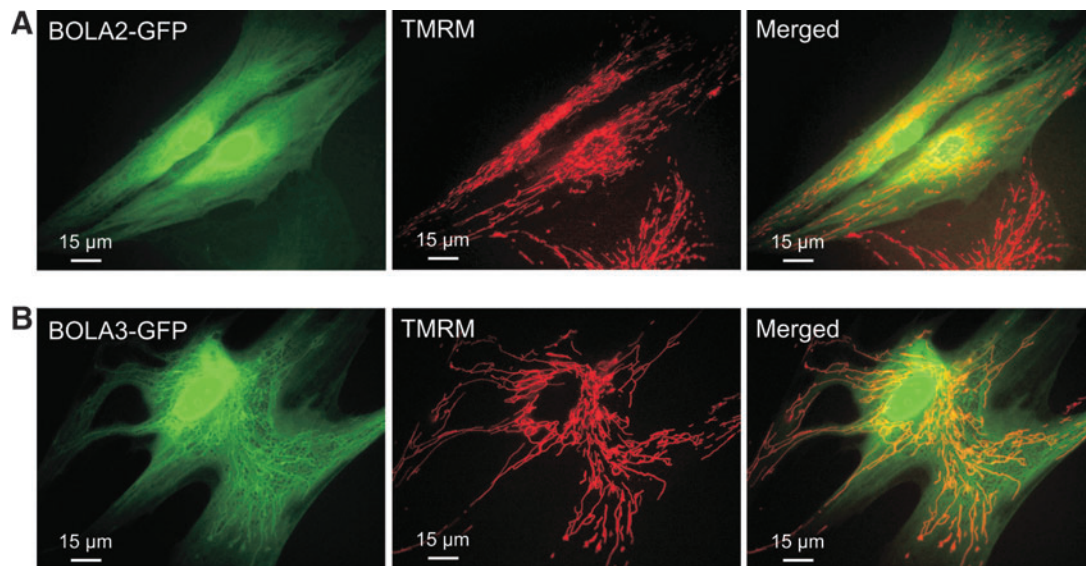

**SUPPLEMENTARY FIG. S2. Intracellular localization of BOLA2 and BOLA3.** (A) Fibroblasts transduced to overexpress BOLA2-GFP show a clear cytosolic and nuclear staining but no enhanced mitochondrial staining. (B) BOLA3-GFP positive fibroblasts show enhanced mitochondrial staining on top of a clear cytosolic and nuclear staining. Cells were loaded with TMRM to visualize the mitochondria (*middle panels*). Note that cytosolic and nuclear staining are absent in BOLA1-GFP positive fibroblasts (Fig. 2A). The results suggest a mitochondrial localization of BOLA1, a cytoplasmic/nuclear localization of BOLA2 and a cytoplasmic/nuclear/mitochondrial localization of BOLA3. Images are contrast optimized for visualization purposes.
