# Supplementary material
Source: PubMed Central journal article supplement (PMC3513987)
Supplement: Supp_Fig5.pdf [file Supp_Fig5.pdf]

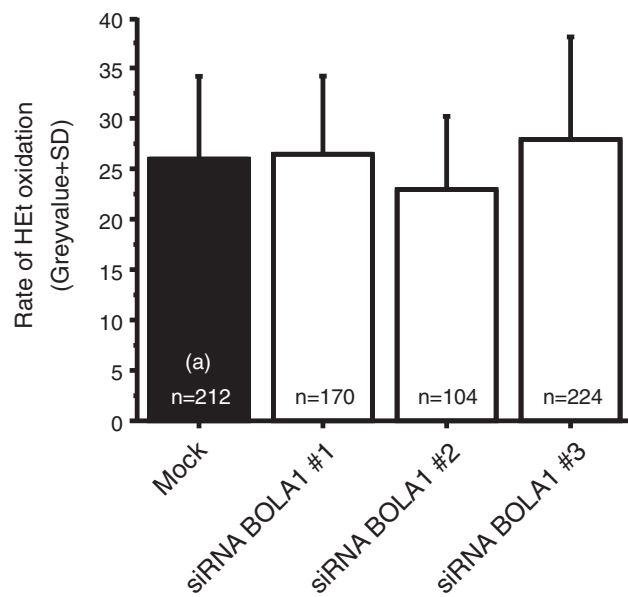

←  
**SUPPLEMENTARY FIG. S5. Effect of BOLA1 knock-down on the rate of hydroethidine oxidation.** Fibroblasts in which BOLA1 was knocked down were loaded with 10  $\mu$ M HET (Molecular Probes) for 10 min at 37°C. The reaction was stopped by thoroughly washing the cells with PBS to remove excess HET. Digital imaging microscopy and quantitative analysis of Et fluorescence was performed as described before (5). The results depicted show that BOLA1 knockdown has no effect on the rate of HET oxidation. Numerals indicate the numbers of cells analyzed. HET, hydroethidine. (a) Mock.
