# Supplementary material
Source: PubMed Central journal article supplement (PMC3513987)
Supplement: Supp_Table1a.pdf [file Supp_Table1a.pdf]

SUPPLEMENTARY TABLE S1A. RESULTS OF SINGLE STEP TANDEM AFFINITY PURIFICATIONS OF BOLA1

| <i>GI</i> | <i>Peptides neg.</i> | <i>Peptides pos.</i> | <i>emPAI neg.</i> | <i>emPAI pos.</i> | <i>emPAI pos./neg.</i> | <i>Background peptides</i> | <i>Protein</i>                                                                                                 |
|-----------|----------------------|----------------------|-------------------|-------------------|------------------------|----------------------------|----------------------------------------------------------------------------------------------------------------|
| 42516576  | 0                    | 3                    | 0                 | 3.64              | 9999                   | 0                          | <b>Glutaredoxin 5</b>                                                                                          |
| 4826848   | 0                    | 1                    | 0                 | 0.58              | 9999                   | 1                          | NADH dehydrogenase (ubiquinone) 1 alpha subcomplex, 5                                                          |
| 11024700  | 0                    | 1                    | 0                 | 0.46              | 9999                   | 0                          | <b>Translocase of inner mitochondrial membrane 13</b>                                                          |
| 4758788   | 0                    | 2                    | 0                 | 0.35              | 9999                   | 3                          | NADH dehydrogenase (ubiquinone) Fe-S protein 3, 30 kDa (NADH-coenzyme Q reductase)                             |
| 32483377  | 0                    | 1                    | 0                 | 0.23              | 9999                   | 15                         | Peroxiredoxin 3 isoform b                                                                                      |
| 153791313 | 0                    | 1                    | 0                 | 0.19              | 9999                   | 0                          | <b>Cytochrome oxidase deficient homolog 2</b>                                                                  |
| 4503607   | 0                    | 1                    | 0                 | 0.16              | 9999                   | 2                          | Electron transfer flavoprotein, alpha polypeptide isoform a                                                    |
| 11321583  | 0                    | 1                    | 0                 | 0.10              | 9999                   | 2                          | Succinate-CoA ligase, ADP-forming, beta subunit precursor                                                      |
| 7705638   | 4                    | 11                   | 2.72              | 99                | 36.29                  | 0                          | bolA-like 1                                                                                                    |
| 95113651  | 3                    | 10                   | 0.50              | 4.81              | 9.60                   | 13                         | Glutaredoxin 3                                                                                                 |
| 32189392  | 1                    | 3                    | 0.25              | 0.99              | 3.84                   | 17                         | Peroxiredoxin 2 isoform a                                                                                      |
| 16596694  | 1                    | 2                    | 0.46              | 1.15              | 2.46                   | 0                          | Mitochondrial ribosomal protein L53                                                                            |
| 183227678 | 1                    | 1                    | 0.33              | 0.77              | 2.33                   | 31                         | Parkinson disease protein 7                                                                                    |
| 171906593 | 2                    | 3                    | 0.31              | 0.71              | 2.31                   | 4                          | Branched chain ketoacid dehydrogenase kinase isoform b                                                         |
| 4507231   | 1                    | 2                    | 0.29              | 0.66              | 2.29                   | 20                         | Single-stranded DNA binding protein 1                                                                          |
| 31542947  | 8                    | 13                   | 1.27              | 2.72              | 2.13                   | 181                        | Chaperonin                                                                                                     |
| 46593007  | 1                    | 2                    | 0.11              | 0.24              | 2.11                   | 1                          | Ubiquinol-cytochrome c reductase core protein I                                                                |
| 21735621  | 3                    | 5                    | 0.43              | 0.83              | 1.89                   | 63                         | Mitochondrial malate dehydrogenase precursor                                                                   |
| 155722983 | 5                    | 8                    | 0.40              | 0.71              | 1.78                   | 38                         | TNF receptor-associated protein 1                                                                              |
| 4885079   | 2                    | 3                    | 0.42              | 0.70              | 1.64                   | 13                         | ATP synthase, H <sup>+</sup> transporting, mitochondrial F1 complex, gamma subunit isoform H (heart) precursor |
| 4757732   | 4                    | 6                    | 0.37              | 0.61              | 1.63                   | 19                         | Programmed cell death 8 isoform 1                                                                              |
| 21361114  | 2                    | 3                    | 0.29              | 0.46              | 1.60                   | 27                         | Solute carrier family 25 (mitochondrial carrier; oxoglutarate carrier), member 11                              |
| 4505773   | 6                    | 7                    | 1.37              | 2.16              | 1.57                   | 77                         | Prohibitin                                                                                                     |
| 4758638   | 4                    | 5                    | 1.03              | 1.42              | 1.38                   | 48                         | Peroxiredoxin 6                                                                                                |
| 4502491   | 4                    | 5                    | 0.93              | 1.27              | 1.37                   | 39                         | Complement component 1, q subcomponent binding protein precursor                                               |
| 47132595  | 4                    | 5                    | 0.66              | 0.89              | 1.34                   | 32                         | Solute carrier family 25 member 3 isoform b precursor                                                          |
| 11386135  | 14                   | 15                   | 5.06              | 6.40              | 1.26                   | 33                         | Branched chain keto acid dehydrogenase E1, alpha polypeptide                                                   |
| 70995211  | 5                    | 5                    | 1.25              | 1.58              | 1.26                   | 17                         | Peroxisomal enoyl-coenzyme A hydratase-like protein                                                            |
| 65506442  | 32                   | 33                   | 10.93             | 13.25             | 1.21                   | 288                        | Propionyl-Coenzyme A carboxylase, alpha polypeptide isoform a precursor                                        |
| 32189394  | 8                    | 8                    | 0.93              | 1.09              | 1.17                   | 118                        | ATP synthase, H <sup>+</sup> transporting, mitochondrial F1 complex, beta subunit precursor                    |
| 41872631  | 10                   | 10                   | 0.22              | 0.25              | 1.11                   | 160                        | Fatty acid synthase                                                                                            |
| 119943100 | 23                   | 21                   | 5.89              | 5.89              | 1                      | 209                        | Propionyl Coenzyme A carboxylase, beta polypeptide                                                             |
| 4557353   | 8                    | 8                    | 3.21              | 3.21              | 1                      | 12                         | Branched chain keto acid dehydrogenase E1 beta polypeptide precursor                                           |
| 24234688  | 17                   | 17                   | 2.51              | 2.51              | 1                      | 137                        | Heat shock 70 kDa protein 9 precursor                                                                          |
| 50345984  | 13                   | 13                   | 2.30              | 2.30              | 1                      | 99                         | ATP synthase, H <sup>+</sup> transporting, mitochondrial F1 complex, alpha subunit precursor                   |
| 94538322  | 4                    | 4                    | 1.27              | 1.27              | 1                      | 4                          | Hydroxyacyl glutathione hydrolase isoform 1                                                                    |
| 4505591   | 3                    | 3                    | 0.77              | 0.77              | 1                      | 78                         | Peroxiredoxin 1                                                                                                |
| 5453607   | 4                    | 3                    | 0.55              | 0.55              | 1                      | 56                         | Chaperonin containing TCP1, subunit 7 isoform a                                                                |
| 34147630  | 4                    | 4                    | 0.42              | 0.42              | 1                      | 40                         | Tu translation elongation factor, mitochondrial precursor                                                      |
| 4758504   | 2                    | 2                    | 0.42              | 0.42              | 1                      | 25                         | Hydroxysteroid (17-beta) dehydrogenase 10 isoform 1                                                            |
| 50592994  | 1                    | 1                    | 0.38              | 0.38              | 1                      | 26                         | Thioredoxin                                                                                                    |

(continued)

SUPPLEMENTARY TABLE S1A. (CONTINUED)

| <i>GI</i> | <i>Peptides<br/>neg.</i> | <i>Peptides<br/>pos.</i> | <i>emPAI<br/>neg.</i> | <i>emPAI<br/>pos.</i> | <i>emPAI<br/>pos./neg.</i> | <i>Background<br/>peptides</i> | <i>Protein</i>                                                                               |
|-----------|--------------------------|--------------------------|-----------------------|-----------------------|----------------------------|--------------------------------|----------------------------------------------------------------------------------------------|
| 13376007  | 1                        | 1                        | 0.25                  | 0.25                  | 1                          | 0                              | Isochorismatase domain containing 2 isoform 2                                                |
| 13129148  | 1                        | 1                        | 0.25                  | 0.25                  | 1                          | 0                              | Apolipoprotein O                                                                             |
| 8923390   | 1                        | 1                        | 0.23                  | 0.23                  | 1                          | 3                              | Coiled-coil-helix-coiled-coil-helix domain<br>containing 3                                   |
| 4557237   | 2                        | 2                        | 0.22                  | 0.22                  | 1                          | 11                             | Acetyl-Coenzyme A acetyltransferase 1 precursor                                              |
| 38569421  | 4                        | 4                        | 0.18                  | 0.18                  | 1                          | 31                             | ATP citrate lyase isoform 1                                                                  |
| 4502013   | 1                        | 1                        | 0.17                  | 0.17                  | 1                          | 1                              | Adenylate kinase 2 isoform a                                                                 |
| 5031815   | 2                        | 2                        | 0.17                  | 0.17                  | 1                          | 3                              | Lysyl-tRNA synthetase isoform 2                                                              |
| 42476028  | 2                        | 2                        | 0.17                  | 0.17                  | 1                          | 0                              | ATPase family, AAA domain containing 3A                                                      |
| 21361565  | 1                        | 1                        | 0.15                  | 0.15                  | 1                          | 8                              | ATP synthase, H <sup>+</sup> transporting, mitochondrial F0<br>complex, subunit B1 precursor |

We generated HEK293 T-REx cells that inducibly express the proteins with a C-terminal TAP-tagged BOLA1. Cell lysates were affinity purified and eluates were analyzed using nanospray ionization liquid chromatography tandem mass spectrometry (nLC-MS/MS) to identify interacting proteins. The procedure was carried out without induction (neg.) as well as 24 h after antibiotic induction (pos.) of TAP-tagged protein. The list is limited to proteins in mitochondrial compendium (11). Background peptides denote number of peptides of the protein copurified with TAP-tagged control proteins. Proteins that were not copurified with control proteins and only copurified after antibiotic induction are marked with bold typeface. GI, Protein Genbank Identifier Accession; emPAI, exponentially modified Protein Abundance Index.
