# Supplementary material
Source: PubMed Central journal article supplement (PMC3513987)
Supplement: Supp_Table1b.pdf [file Supp_Table1b.pdf]

SUPPLEMENTARY TABLE S1B. RESULTS OF SINGLE STEP TANDEM AFFINITY PURIFICATIONS OF GLRX5

| <i>GI</i> | <i>Peptides<br/>neg.</i> | <i>Peptides<br/>pos.</i> | <i>emPAI<br/>neg.</i> | <i>emPAI<br/>pos.</i> | <i>Ratio<br/>pos./neg.</i> | <i>Background<br/>peptides</i> | <i>Protein</i>                                                                                             |
|-----------|--------------------------|--------------------------|-----------------------|-----------------------|----------------------------|--------------------------------|------------------------------------------------------------------------------------------------------------|
| 17981858  | 0                        | 1                        | 0                     | 0.77                  | 9999                       | 0                              | <b>ATP synthase F0 subunit 6</b> [ <i>Homo sapiens</i> ]                                                   |
| 14150128  | 0                        | 1                        | 0                     | 0.58                  | 9999                       | 0                              | <b>Hypothetical protein LOC84300</b> [ <i>Homo sapiens</i> ]                                               |
| 11024700  | 0                        | 1                        | 0                     | 0.46                  | 9999                       | 0                              | <b>Translocase of inner mitochondrial membrane 13</b> [ <i>Homo sapiens</i> ]                              |
| 7705638   | 0                        | 1                        | 0                     | 0.38                  | 9999                       | 0                              | <b>bolA-like 1</b> [ <i>Homo sapiens</i> ]                                                                 |
| 55769543  | 0                        | 1                        | 0                     | 0.33                  | 9999                       | 0                              | <b>Mitochondrial ribosomal protein L14</b> [ <i>Homo sapiens</i> ]                                         |
| 20127408  | 0                        | 3                        | 0                     | 0.21                  | 9999                       | 2                              | Mitochondrial trifunctional protein, alpha subunit precursor [ <i>Homo sapiens</i> ]                       |
| 5174539   | 0                        | 1                        | 0                     | 0.19                  | 9999                       | 17                             | Cytosolic malate dehydrogenase [ <i>Homo sapiens</i> ]                                                     |
| 33519455  | 0                        | 1                        | 0                     | 0.15                  | 9999                       | 0                              | <b>Methionine adenosyltransferase II, beta isoform 2</b> [ <i>Homo sapiens</i> ]                           |
| 20127454  | 0                        | 2                        | 0                     | 0.14                  | 9999                       | 30                             | 5-Aminoimidazole-4-carboxamide ribonucleotide formyltransferase/IMP cyclohydrolase [ <i>Homo sapiens</i> ] |
| 50592988  | 0                        | 1                        | 0                     | 0.14                  | 9999                       | 4                              | Ubiquinol-cytochrome c reductase core protein II [ <i>Homo sapiens</i> ]                                   |
| 167614485 | 0                        | 1                        | 0                     | 0.13                  | 9999                       | 0                              | <b>Acetyl-coenzyme A acyltransferase 2</b> [ <i>Homo sapiens</i> ]                                         |
| 212549553 | 0                        | 2                        | 0                     | 0.12                  | 9999                       | 34                             | Interleukin enhancer binding factor 3 isoform d [ <i>Homo sapiens</i> ]                                    |
| 46593007  | 0                        | 1                        | 0                     | 0.11                  | 9999                       | 1                              | <b>Ubiquinol-cytochrome c reductase core protein I</b> [ <i>Homo sapiens</i> ]                             |
| 22547134  | 0                        | 1                        | 0                     | 0.08                  | 9999                       | 0                              | <b>Mitochondrial ribosomal protein L37</b> [ <i>Homo sapiens</i> ]                                         |
| 42516576  | 5                        | 11                       | 2.16                  | 49.11                 | 22.71                      | 0                              | Glutaredoxin 5                                                                                             |
| 50592994  | 1                        | 3                        | 0.38                  | 1.68                  | 4.32                       | 26                             | Thioredoxin [ <i>Homo sapiens</i> ]                                                                        |
| 4758304   | 1                        | 3                        | 0.06                  | 0.20                  | 3.19                       | 17                             | Protein disulfide isomerase-associated 4 [ <i>Homo sapiens</i> ]                                           |
| 4502989   | 1                        | 2                        | 1.15                  | 3.64                  | 3.15                       | 1                              | Cytochrome c oxidase subunit VIIa polypeptide 2 (liver) precursor [ <i>Homo sapiens</i> ]                  |
| 14043026  | 1                        | 2                        | 0.46                  | 1.15                  | 2.46                       | 3                              | Vesicle-associated membrane protein 8 [ <i>Homo sapiens</i> ]                                              |
| 25188179  | 2                        | 4                        | 0.42                  | 1.03                  | 2.42                       | 21                             | Voltage-dependent anion channel 3 isoform b [ <i>Homo sapiens</i> ]                                        |
| 21735621  | 5                        | 9                        | 0.83                  | 1.97                  | 2.37                       | 63                             | Mitochondrial malate dehydrogenase precursor [ <i>Homo sapiens</i> ]                                       |

(continued)

SUPPLEMENTARY TABLE S1B. (CONTINUED)

| <i>GI</i> | <i>Peptides<br/>neg.</i> | <i>Peptides<br/>pos.</i> | <i>emPAI<br/>neg.</i> | <i>emPAI<br/>pos.</i> | <i>Ratio<br/>pos./neg.</i> | <i>Background<br/>peptides</i> | <i>Protein</i>                                                                                                       |
|-----------|--------------------------|--------------------------|-----------------------|-----------------------|----------------------------|--------------------------------|----------------------------------------------------------------------------------------------------------------------|
| 156071462 | 2                        | 4                        | 0.31                  | 0.71                  | 2.31                       | 10                             | Solute carrier family 25, member A6 [ <i>Homo sapiens</i> ]                                                          |
| 27436901  | 1                        | 2                        | 0.29                  | 0.66                  | 2.29                       | 6                              | Mitochondrial ribosomal protein L12 [ <i>Homo sapiens</i> ]                                                          |
| 4557809   | 2                        | 4                        | 0.27                  | 0.62                  | 2.27                       | 31                             | Ornithine aminotransferase precursor [ <i>Homo sapiens</i> ]                                                         |
| 70995211  | 1                        | 2                        | 0.14                  | 0.31                  | 2.14                       | 17                             | Peroxisomal enoyl-coenzyme A hydratase-like protein [ <i>Homo sapiens</i> ]                                          |
| 33636719  | 1                        | 2                        | 0.09                  | 0.19                  | 2.09                       | 4                              | Translocase of inner mitochondrial membrane 44 [ <i>Homo sapiens</i> ]                                               |
| 62912457  | 1                        | 2                        | 0.05                  | 0.11                  | 2.05                       | 27                             | Pyrroline-5-carboxylate synthetase isoform 2 [ <i>Homo sapiens</i> ]                                                 |
| 4502491   | 3                        | 4                        | 0.63                  | 1.27                  | 2.00                       | 39                             | Complement component 1, q subcomponent binding protein precursor [ <i>Homo sapiens</i> ]                             |
| 4507879   | 3                        | 5                        | 0.53                  | 1.05                  | 1.95                       | 28                             | Voltage-dependent anion channel 1 [ <i>Homo sapiens</i> ]                                                            |
| 155722983 | 6                        | 9                        | 0.50                  | 0.83                  | 1.67                       | 38                             | TNF receptor-associated protein 1 [ <i>Homo sapiens</i> ]                                                            |
| 32483377  | 3                        | 4                        | 0.87                  | 1.31                  | 1.49                       | 15                             | Peroxiredoxin 3 isoform b [ <i>Homo sapiens</i> ]                                                                    |
| 31542947  | 9                        | 11                       | 1.27                  | 1.91                  | 1.49                       | 181                            | Chaperonin [ <i>Homo sapiens</i> ]                                                                                   |
| 15149476  | 5                        | 7                        | 0.35                  | 0.52                  | 1.49                       | 33                             | Arginyl-tRNA synthetase [ <i>Homo sapiens</i> ]                                                                      |
| 116805327 | 10                       | 11                       | 1.26                  | 1.82                  | 1.44                       | 179                            | Methylcrotonoyl-Coenzyme A carboxylase 1 (alpha) precursor [ <i>Homo sapiens</i> ]                                   |
| 5453607   | 3                        | 4                        | 0.30                  | 0.42                  | 1.39                       | 56                             | Chaperonin containing TCP1, subunit 7 isoform a [ <i>Homo sapiens</i> ]                                              |
| 50345984  | 8                        | 10                       | 0.97                  | 1.34                  | 1.37                       | 99                             | ATP synthase, H <sup>+</sup> transporting, mitochondrial F1 complex, alpha subunit precursor [ <i>Homo sapiens</i> ] |
| 154354964 | 3                        | 4                        | 0.19                  | 0.26                  | 1.37                       | 0                              | Inner membrane protein, mitochondrial isoform 1 [ <i>Homo sapiens</i> ]                                              |
| 38569421  | 3                        | 4                        | 0.13                  | 0.18                  | 1.36                       | 31                             | ATP citrate lyase isoform 1 [ <i>Homo sapiens</i> ]                                                                  |
| 4557032   | 4                        | 4                        | 0.77                  | 1.05                  | 1.35                       | 118                            | L-lactate dehydrogenase B [ <i>Homo sapiens</i> ]                                                                    |
| 156071459 | 4                        | 5                        | 0.77                  | 1.05                  | 1.35                       | 62                             | Solute carrier family 25, member 5 [ <i>Homo sapiens</i> ]                                                           |
| 48526509  | 4                        | 4                        | 0.71                  | 0.96                  | 1.34                       | 5                              | Translocase of inner mitochondrial membrane 50 homolog [ <i>Homo sapiens</i> ]                                       |
| 11386135  | 11                       | 11                       | 2.67                  | 3.48                  | 1.30                       | 33                             | Branched chain keto acid dehydrogenase E1, alpha polypeptide [ <i>Homo sapiens</i> ]                                 |
| 106049528 | 23                       | 27                       | 2.03                  | 2.56                  | 1.25                       | 302                            | Pyruvate carboxylase precursor [ <i>Homo sapiens</i> ]                                                               |
| 41872631  | 9                        | 10                       | 0.20                  | 0.22                  | 1.12                       | 160                            | Fatty acid synthase [ <i>Homo sapiens</i> ]                                                                          |
| 194248072 | 19                       | 16                       | 4.29                  | 4.73                  | 1.10                       | 216                            | Heat shock 70 kDa protein 1A [ <i>Homo sapiens</i> ]                                                                 |
| 24234688  | 16                       | 16                       | 2.51                  | 2.76                  | 1.10                       | 137                            | Heat shock 70 kDa protein 9 precursor [ <i>Homo sapiens</i> ]                                                        |
| 4757812   | 2                        | 2                        | 2.16                  | 2.16                  | 1                          | 0                              | ATP synthase, H <sup>+</sup> transporting, mitochondrial F0 complex, subunit F2 isoform 2a [ <i>Homo sapiens</i> ]   |
| 4505773   | 5                        | 5                        | 1.37                  | 1.37                  | 1                          | 77                             | Prohibitin [ <i>Homo sapiens</i> ]                                                                                   |
| 190885499 | 2                        | 2                        | 1.15                  | 1.15                  | 1                          | 7                              | Cytochrome c oxidase subunit Va precursor [ <i>Homo sapiens</i> ]                                                    |
| 51479156  | 2                        | 2                        | 1.15                  | 1.15                  | 1                          | 5                              | ATP synthase, H <sup>+</sup> transporting, mitochondrial F0 complex, subunit G [ <i>Homo sapiens</i> ]               |
| 14249376  | 1                        | 1                        | 1.15                  | 1.15                  | 1                          | 5                              | Upregulated during skeletal muscle growth 5 [ <i>Homo sapiens</i> ]                                                  |
| 91199540  | 6                        | 5                        | 0.87                  | 0.87                  | 1                          | 88                             | Dihydrolipoamide dehydrogenase precursor [ <i>Homo sapiens</i> ]                                                     |
| 7657369   | 2                        | 2                        | 0.77                  | 0.77                  | 1                          | 0                              | NADH dehydrogenase (ubiquinone) 1 alpha subcomplex, 8, 19 kDa [ <i>Homo sapiens</i> ]                                |
| 32189394  | 6                        | 6                        | 0.63                  | 0.63                  | 1                          | 118                            | ATP synthase, H <sup>+</sup> transporting, mitochondrial F1 complex, beta subunit precursor [ <i>Homo sapiens</i> ]  |
| 42476281  | 3                        | 3                        | 0.63                  | 0.63                  | 1                          | 19                             | Voltage-dependent anion channel 2 [ <i>Homo sapiens</i> ]                                                            |
| 55956777  | 2                        | 2                        | 0.58                  | 0.58                  | 1                          | 0                              | Sterol carrier protein 2 isoform 1 precursor [ <i>Homo sapiens</i> ]                                                 |
| 5032051   | 1                        | 1                        | 0.58                  | 0.58                  | 1                          | 7                              | Ribosomal protein S14 [ <i>Homo sapiens</i> ]                                                                        |
| 4826848   | 1                        | 1                        | 0.58                  | 0.58                  | 1                          | 1                              | NADH dehydrogenase (ubiquinone) 1 alpha subcomplex, 5 [ <i>Homo sapiens</i> ]                                        |

(continued)

SUPPLEMENTARY TABLE S1B. (CONTINUED)

| <i>GI</i> | <i>Peptides<br/>neg.</i> | <i>Peptides<br/>pos.</i> | <i>emPAI<br/>neg.</i> | <i>emPAI<br/>pos.</i> | <i>Ratio<br/>pos./neg.</i> | <i>Background<br/>peptides</i> | <i>Protein</i>                                                                                                    |
|-----------|--------------------------|--------------------------|-----------------------|-----------------------|----------------------------|--------------------------------|-------------------------------------------------------------------------------------------------------------------|
| 4505357   | 1                        | 1                        | 0.58                  | 0.58                  | 1                          | 2                              | NADH dehydrogenase (ubiquinone) 1 alpha subcomplex, 4, 9 kDa [ <i>Homo sapiens</i> ]                              |
| 4557353   | 3                        | 3                        | 0.53                  | 0.53                  | 1                          | 12                             | Branched chain keto acid dehydrogenase E1 beta polypeptide precursor [ <i>Homo sapiens</i> ]                      |
| 16554604  | 2                        | 2                        | 0.51                  | 0.51                  | 1                          | 0                              | Mitochondrial ribosomal protein S23 [ <i>Homo sapiens</i> ]                                                       |
| 119395754 | 5                        | 5                        | 0.48                  | 0.48                  | 1                          | 105                            | Keratin 5 [ <i>Homo sapiens</i> ]                                                                                 |
| 91984773  | 2                        | 2                        | 0.33                  | 0.33                  | 1                          | 6                              | Apolipoprotein A-I binding protein precursor [ <i>Homo sapiens</i> ]                                              |
| 62420877  | 2                        | 2                        | 0.29                  | 0.29                  | 1                          | 1                              | Electron-transfer-flavoprotein, beta polypeptide isoform 2 [ <i>Homo sapiens</i> ]                                |
| 4507231   | 1                        | 1                        | 0.29                  | 0.29                  | 1                          | 20                             | Single-stranded DNA binding protein 1 [ <i>Homo sapiens</i> ]                                                     |
| 4758774   | 1                        | 1                        | 0.23                  | 0.23                  | 1                          | 0                              | NADH dehydrogenase (ubiquinone) 1 beta subcomplex, 10, 22 kDa [ <i>Homo sapiens</i> ]                             |
| 4557237   | 2                        | 2                        | 0.22                  | 0.22                  | 1                          | 11                             | Acetyl-Coenzyme A acetyltransferase 1 precursor [ <i>Homo sapiens</i> ]                                           |
| 8922701   | 2                        | 2                        | 0.22                  | 0.22                  | 1                          | 0                              | Acylglycerol kinase [ <i>Homo sapiens</i> ]                                                                       |
| 19923315  | 2                        | 2                        | 0.19                  | 0.19                  | 1                          | 37                             | Serine hydroxymethyltransferase 2 (mitochondrial) [ <i>Homo sapiens</i> ]                                         |
| 4507401   | 1                        | 1                        | 0.19                  | 0.19                  | 1                          | 0                              | Transcription factor A, mitochondrial [ <i>Homo sapiens</i> ]                                                     |
| 189181759 | 1                        | 1                        | 0.17                  | 0.17                  | 1                          | 3                              | Electron transfer flavoprotein, alpha polypeptide isoform b [ <i>Homo sapiens</i> ]                               |
| 190358517 | 1                        | 1                        | 0.17                  | 0.17                  | 1                          | 0                              | RAB11B, member RAS oncogene family [ <i>Homo sapiens</i> ]                                                        |
| 194097323 | 1                        | 1                        | 0.16                  | 0.16                  | 1                          | 6                              | Mitochondrial short-chain enoyl-coenzyme A hydratase 1 precursor [ <i>Homo sapiens</i> ]                          |
| 21389315  | 1                        | 1                        | 0.16                  | 0.16                  | 1                          | 10                             | Solute carrier family 25 (mitochondrial carrier; citrate transporter), member 1 precursor [ <i>Homo sapiens</i> ] |
| 169636418 | 1                        | 1                        | 0.14                  | 0.14                  | 1                          | 0                              | Mitochondrial ribosomal protein L38 [ <i>Homo sapiens</i> ]                                                       |
| 66392203  | 1                        | 1                        | 0.13                  | 0.13                  | 1                          | 67                             | NME1-NME2 protein [ <i>Homo sapiens</i> ]                                                                         |
| 25777721  | 1                        | 1                        | 0.10                  | 0.10                  | 1                          | 0                              | Aldehyde dehydrogenase 5A1 isoform 1 precursor [ <i>Homo sapiens</i> ]                                            |
| 34147522  | 1                        | 1                        | 0.09                  | 0.09                  | 1                          | 0                              | Chaperone, ABC1 activity of bc1 complex like precursor [ <i>Homo sapiens</i> ]                                    |
| 38679967  | 82                       | 74                       | 5.38                  | 5.13                  | 0.95                       | 1028                           | Acetyl-Coenzyme A carboxylase alpha isoform 2 [ <i>Homo sapiens</i> ]                                             |
| 38679974  | 78                       | 71                       | 5.28                  | 5.03                  | 0.95                       | 995                            | Acetyl-Coenzyme A carboxylase alpha isoform 4 [ <i>Homo sapiens</i> ]                                             |
| 134142062 | 21                       | 18                       | 0.51                  | 0.43                  | 0.83                       | 241                            | Acetyl-Coenzyme A carboxylase beta [ <i>Homo sapiens</i> ]                                                        |
| 119943100 | 18                       | 19                       | 5.40                  | 4.51                  | 0.83                       | 209                            | Propionyl Coenzyme A carboxylase, beta polypeptide [ <i>Homo sapiens</i> ]                                        |
| 4505591   | 7                        | 6                        | 2.83                  | 2.16                  | 0.76                       | 78                             | Peroxiredoxin 1 [ <i>Homo sapiens</i> ]                                                                           |
| 5031857   | 5                        | 4                        | 0.89                  | 0.66                  | 0.74                       | 94                             | L-lactate dehydrogenase A isoform 1 [ <i>Homo sapiens</i> ]                                                       |
| 34147630  | 4                        | 3                        | 0.42                  | 0.30                  | 0.71                       | 40                             | Tu translation elongation factor, mitochondrial precursor [ <i>Homo sapiens</i> ]                                 |
| 21361114  | 4                        | 3                        | 0.66                  | 0.46                  | 0.70                       | 27                             | Solute carrier family 25 (mitochondrial carrier; oxoglutarate carrier), member 11 [ <i>Homo sapiens</i> ]         |
| 65506442  | 28                       | 22                       | 5.61                  | 3.92                  | 0.69                       | 288                            | Propionyl-Coenzyme A carboxylase, alpha polypeptide isoform a precursor [ <i>Homo sapiens</i> ]                   |
| 94538322  | 3                        | 2                        | 0.63                  | 0.38                  | 0.61                       | 4                              | Hydroxyacyl glutathione hydrolase isoform 1 [ <i>Homo sapiens</i> ]                                               |
| 110671329 | 15                       | 14                       | 7.11                  | 4.33                  | 0.60                       | 123                            | Dihydrolipoamide branched chain transacylase precursor [ <i>Homo sapiens</i> ]                                    |

(continued)

SUPPLEMENTARY TABLE S1B. (CONTINUED)

| <i>GI</i> | <i>Peptides neg.</i> | <i>Peptides pos.</i> | <i>emPAI neg.</i> | <i>emPAI pos.</i> | <i>Ratio pos./neg.</i> | <i>Background peptides</i> | <i>Protein</i>                                                                                                    |
|-----------|----------------------|----------------------|-------------------|-------------------|------------------------|----------------------------|-------------------------------------------------------------------------------------------------------------------|
| 4758504   | 3                    | 2                    | 0.70              | 0.42              | 0.60                   | 25                         | Hydroxysteroid (17-beta) dehydrogenase 10 isoform 1 [ <i>Homo sapiens</i> ]                                       |
| 4758638   | 3                    | 2                    | 0.70              | 0.42              | 0.60                   | 48                         | Peroxiredoxin 6 [ <i>Homo sapiens</i> ]                                                                           |
| 4502303   | 3                    | 2                    | 0.77              | 0.46              | 0.60                   | 13                         | Mitochondrial ATP synthase, O subunit precursor [ <i>Homo sapiens</i> ]                                           |
| 11545863  | 15                   | 12                   | 3.52              | 2.03              | 0.57                   | 213                        | Methylcrotonoyl-Coenzyme A carboxylase 2 (beta) [ <i>Homo sapiens</i> ]                                           |
| 183227678 | 3                    | 2                    | 1.37              | 0.77              | 0.56                   | 31                         | Parkinson disease protein 7 [ <i>Homo sapiens</i> ]                                                               |
| 4504523   | 3                    | 2                    | 2.16              | 1.15              | 0.53                   | 17                         | Heat shock 10 kDa protein 1 [ <i>Homo sapiens</i> ]                                                               |
| 31621305  | 2                    | 1                    | 0.06              | 0.03              | 0.49                   | 17                         | Leucine-rich PPR motif-containing protein [ <i>Homo sapiens</i> ]                                                 |
| 14043022  | 2                    | 1                    | 0.13              | 0.06              | 0.48                   | 1                          | Methionyl-tRNA synthetase [ <i>Homo sapiens</i> ]                                                                 |
| 7657581   | 2                    | 1                    | 0.16              | 0.07              | 0.48                   | 4                          | Solute carrier family 25, member 13 (citrin) [ <i>Homo sapiens</i> ]                                              |
| 42476028  | 2                    | 1                    | 0.17              | 0.08              | 0.48                   | 0                          | ATPase family, AAA domain containing 3A [ <i>Homo sapiens</i> ]                                                   |
| 75677353  | 2                    | 1                    | 0.17              | 0.08              | 0.48                   | 3                          | AAA-ATPase TOB3 [ <i>Homo sapiens</i> ]                                                                           |
| 47132595  | 2                    | 1                    | 0.29              | 0.13              | 0.46                   | 32                         | Solute carrier family 25 member 3 isoform b precursor [ <i>Homo sapiens</i> ]                                     |
| 32189392  | 5                    | 3                    | 2.16              | 0.99              | 0.46                   | 17                         | Peroxiredoxin 2 isoform a [ <i>Homo sapiens</i> ]                                                                 |
| 94538362  | 4                    | 2                    | 0.49              | 0.22              | 0.45                   | 59                         | Flotillin 2 [ <i>Homo sapiens</i> ]                                                                               |
| 4507149   | 2                    | 1                    | 1.51              | 0.58              | 0.38                   | 13                         | Superoxide dismutase 1, soluble [ <i>Homo sapiens</i> ]                                                           |
| 4757732   | 5                    | 2                    | 0.48              | 0.17              | 0.35                   | 19                         | Programmed cell death 8 isoform 1 [ <i>Homo sapiens</i> ]                                                         |
| 186928850 | 3                    | 1                    | 0.33              | 0.10              | 0.30                   | 0                          | Mitochondrial ribosomal protein S27 [ <i>Homo sapiens</i> ]                                                       |
| 171906593 | 3                    | 1                    | 0.50              | 0.14              | 0.28                   | 4                          | Branched chain ketoacid dehydrogenase kinase isoform b [ <i>Homo sapiens</i> ]                                    |
| 19923748  | 5                    | 1                    | 1.27              | 0.17              | 0.14                   | 105                        | Dihydrolipoamide S-succinyltransferase (E2 component of 2-oxo-glutarate complex) [ <i>Homo sapiens</i> ]          |
| 24308295  | 3                    | 0                    | 1.31              | 0                 | 0                      | 23                         | GrpE-like 1, mitochondrial [ <i>Homo sapiens</i> ]                                                                |
| 156564403 | 3                    | 0                    | 0.53              | 0                 | 0                      | 13                         | Pyruvate dehydrogenase (lipoamide) beta [ <i>Homo sapiens</i> ]                                                   |
| 51873036  | 2                    | 0                    | 0.09              | 0                 | 0                      | 252                        | Oxoglutarate (alpha-ketoglutarate) dehydrogenase (lipoamide) isoform 1 precursor [ <i>Homo sapiens</i> ]          |
| 21361565  | 2                    | 0                    | 0.33              | 0                 | 0                      | 8                          | ATP synthase, H <sup>+</sup> transporting, mitochondrial F0 complex, subunit B1 precursor [ <i>Homo sapiens</i> ] |
| 70906441  | 2                    | 0                    | 0.38              | 0                 | 0                      | 11                         | Deoxyuridine triphosphatase isoform 1 precursor [ <i>Homo sapiens</i> ]                                           |
| 31711992  | 1                    | 0                    | 0.07              | 0                 | 0                      | 0                          | Dihydrolipoamide S-acetyltransferase [ <i>Homo sapiens</i> ]                                                      |
| 25777732  | 1                    | 0                    | 0.10              | 0                 | 0                      | 3                          | Mitochondrial aldehyde dehydrogenase 2 precursor [ <i>Homo sapiens</i> ]                                          |
| 4504505   | 1                    | 0                    | 0.07              | 0                 | 0                      | 4                          | Hydroxysteroid (17-beta) dehydrogenase 4 [ <i>Homo sapiens</i> ]                                                  |
| 61175258  | 1                    | 0                    | 0.46              | 0                 | 0                      | 1                          | Hypothetical protein LOC388753 [ <i>Homo sapiens</i> ]                                                            |

Experiment carried out in cells that inducibly express the proteins with a C-terminal TAP-tagged GLRX5 (see Supplementary Table S1a). Proteins that were not copurified with control proteins and only copurified after antibiotic induction are marked with bold typeface.
