# Supplementary material
Source: PubMed Central journal article supplement (PMC3513987)
Supplement: Supp_Table2.pdf [file Supp_Table2.pdf]

SUPPLEMENTARY TABLE S2. MAMMALIAN GENE EXPRESSION  
DATA OF HUMAN AND MOUSE EXAMINED FOR BOLA1  
OVEREXPRESSION UNDER OXIDATIVE STRESS CONDITIONS

| <i>GEO dataset number</i> | <i>Reference</i> |
|---------------------------|------------------|
| GDS1080                   | (10)             |
| GDS3406                   | (1)              |
| GDS3130                   | (17)             |
| GDS3342                   | (9)              |

In none of the datasets did we observe BOLA1 to be overexpressed under oxidative stress conditions relative to the control.
